# Supplementary material for: Strains of bacterial species induce a greatly varied acute adaptive immune response: The contribution of the accessory genome
Source: PubMed Central journal article supplement (PMC5764401; doi:10.1371/journal.ppat.1006726), 2018-01-11
Supplement: ppat.1006726.s001.pdf [file ppat.1006726.s001.pdf]

# S1 Table

**Table 1: post-hoc pairwise comparisons of % CD3+CD4+ T cell proliferation by 16 *S. aureus* strains**

|          | Non Stim | Newman | 8325 | RN4220 | NRS111 | NRS112 | NRS113 | USA100 | USA200 | USA300 | USA500 | USA700 | USA800 | USA600 | Mu50 | VRS2 | VRS3A |
|----------|----------|--------|------|--------|--------|--------|--------|--------|--------|--------|--------|--------|--------|--------|------|------|-------|
| Non Stim |          |        |      |        |        |        |        |        |        |        |        |        |        |        |      |      |       |
| Newman   | ***      |        |      |        |        |        |        |        |        |        |        |        |        |        |      |      |       |
| 8325     | ns       | ***    |      |        |        |        |        |        |        |        |        |        |        |        |      |      |       |
| RN4220   | ns       | ns     | ns   |        |        |        |        |        |        |        |        |        |        |        |      |      |       |
| NRS111   | ***      | ns     | ***  | ns     |        |        |        |        |        |        |        |        |        |        |      |      |       |
| NRS112   | ***      | ns     | **   | ns     | ns     |        |        |        |        |        |        |        |        |        |      |      |       |
| NRS113   | ns       | ns     | ns   | ns     | ns     | ns     |        |        |        |        |        |        |        |        |      |      |       |
| USA100   | ns       | ***    | ns   | ns     | ***    | ns     | ns     |        |        |        |        |        |        |        |      |      |       |
| USA200   | **       | ns     | *    | ns     | ns     | ns     | ns     | ns     |        |        |        |        |        |        |      |      |       |
| USA300   | **       | ns     | ns   | ns     | ns     | ns     | ns     | ns     | ns     |        |        |        |        |        |      |      |       |
| USA500   | ***      | ns     | ***  | ns     | ns     | ns     | ns     | ***    | ns     | ns     |        |        |        |        |      |      |       |
| USA700   | ns       | **     | ns   | ns     | ***    | ns     | ns     | ns     | ns     | ns     | **     |        |        |        |      |      |       |
| USA800   | **       | ns     | *    | ns     | ns     | ns     | ns     | ns     | ns     | ns     | ns     | ns     |        |        |      |      |       |
| USA600   | ns       | ***    | ns   | ns     | ***    | *      | ns     | ns     | ns     | ns     | ***    | ns     | ns     |        |      |      |       |
| Mu50     | ***      | ns     | **   | ns     | ns     | ns     | ns     | ns     | ns     | ns     | ns     | ns     | ns     | *      |      |      |       |
| VRS2     | ns       | *      | ns   | ns     | **     | ns     | ns     | ns     | ns     | ns     | *      | ns     | ns     | ns     | ns   |      |       |
| VRS3A    | ns       | *      | ns   | ns     | **     | ns     | ns     | ns     | ns     | ns     | *      | ns     | ns     | ns     | ns   | ns   |       |

The post hoc analysis adjusts the p-values for multiple testing. In a selected pairwise comparisons we find that more pairs are significantly different, e.g., comparing RN4220 to Newman using the Mann Whitney test yields a p value= 0.0015 for %CD3+CD4+ T cell proliferation.
