# Supplementary material for: Strains of bacterial species induce a greatly varied acute adaptive immune response: The contribution of the accessory genome
Source: PubMed Central journal article supplement (PMC5764401; doi:10.1371/journal.ppat.1006726), 2018-01-11
Supplement: ppat.1006726.s002.pdf [file ppat.1006726.s002.pdf]

## S2 Table

**Table 2: post-hoc pairwise comparisons of %IFN $\gamma$  expressing and proliferating cells by 16 *S. aureus* strains**

|          | Non Stim | Newman | 8325 | RN4 220 | NRS 111 | NRS 112 | NRS 113 | USA 100 | USA 200 | USA 300 | USA 500 | USA 700 | USA 800 | USA 600 | Mu50 | VRS2 | VRS3A |
|----------|----------|--------|------|---------|---------|---------|---------|---------|---------|---------|---------|---------|---------|---------|------|------|-------|
| Non Stim |          |        |      |         |         |         |         |         |         |         |         |         |         |         |      |      |       |
| Newman   | ***      |        |      |         |         |         |         |         |         |         |         |         |         |         |      |      |       |
| 8325     | ns       | ***    |      |         |         |         |         |         |         |         |         |         |         |         |      |      |       |
| RN4220   | ns       | ns     | ns   |         |         |         |         |         |         |         |         |         |         |         |      |      |       |
| NRS111   | ***      | ns     | **   | ns      |         |         |         |         |         |         |         |         |         |         |      |      |       |
| NRS112   | *        | ns     | ns   | ns      | ns      |         |         |         |         |         |         |         |         |         |      |      |       |
| NRS113   | ns       | ns     | ns   | ns      | ns      | ns      |         |         |         |         |         |         |         |         |      |      |       |
| USA100   | ns       | ns     | ns   | ns      | ns      | ns      | ns      |         |         |         |         |         |         |         |      |      |       |
| USA200   | ***      | ns     | **   | ns      | ns      | ns      | ns      | ns      |         |         |         |         |         |         |      |      |       |
| USA300   | ns       | ns     | ns   | ns      | ns      | ns      | ns      | ns      | ns      |         |         |         |         |         |      |      |       |
| USA500   | ***      | ns     | ***  | ns      | ns      | ns      | ns      | ***     | ns      | ns      |         |         |         |         |      |      |       |
| USA700   | ns       | ns     | ns   | ns      | ns      | ns      | ns      | ns      | ns      | ns      | **      |         |         |         |      |      |       |
| USA800   | *        | ns     | ns   | ns      | ns      | ns      | ns      | ns      | ns      | ns      | ns      | ns      |         |         |      |      |       |
| USA600   | ns       | **     | ns   | ns      | **      | ns      | ns      | ns      | *       | ns      | ***     | ns      | ns      |         |      |      |       |
| Mu50     | **       | ns     | *    | ns      | ns      | ns      | ns      | ns      | ns      | ns      | ns      | ns      | ns      | ns      |      |      |       |
| VRS2     | ns       | ns     | ns   | ns      | ns      | ns      | ns      | ns      | ns      | ns      | ns      | ns      | ns      | ns      | ns   |      |       |
| VRS3A    | ns       | ns     | ns   | ns      | ns      | ns      | ns      | ns      | ns      | ns      | ns      | ns      | ns      | ns      | ns   | ns   |       |

The post hoc analysis adjusts the p-values for multiple testing. In a selected pairwise comparisons we find that more pairs are significantly different, e.g., comparing RN4220 to Newman using the Mann Whitney test yields a p value= 0.0068 for %IFN $\gamma$  expressing and proliferating cells.
