# Supplementary material for: Strains of bacterial species induce a greatly varied acute adaptive immune response: The contribution of the accessory genome
Source: PubMed Central journal article supplement (PMC5764401; doi:10.1371/journal.ppat.1006726), 2018-01-11
Supplement: ppat.1006726.s004.pdf [file ppat.1006726.s004.pdf]

S4 Table

Table 4: post-hoc pairwise comparisons of %IgG expressing and proliferating cells by 16 *S. aureus* strains

|          | Non Stim | Newman | 8325 | RN4220 | NRS111 | NRS112 | NRS113 | USA100 | USA200 | USA300 | USA500 | USA700 | USA800 | USA600 | Mu50 | VRS2 | VRS3A |
|----------|----------|--------|------|--------|--------|--------|--------|--------|--------|--------|--------|--------|--------|--------|------|------|-------|
| Non Stim |          |        |      |        |        |        |        |        |        |        |        |        |        |        |      |      |       |
| Newman   | ns       |        |      |        |        |        |        |        |        |        |        |        |        |        |      |      |       |
| 8325     | ns       | ns     |      |        |        |        |        |        |        |        |        |        |        |        |      |      |       |
| RN4220   | ***      | ns     | ***  |        |        |        |        |        |        |        |        |        |        |        |      |      |       |
| NRS111   | ns       | ns     | ns   | *      |        |        |        |        |        |        |        |        |        |        |      |      |       |
| NRS112   | ns       | ns     | ns   | ***    | ns     |        |        |        |        |        |        |        |        |        |      |      |       |
| NRS113   | ns       | ns     | ns   | ***    | ns     | ns     |        |        |        |        |        |        |        |        |      |      |       |
| USA100   | ***      | ns     | ***  | ns     | ns     | *      | ns     |        |        |        |        |        |        |        |      |      |       |
| USA200   | *        | ns     | *    | ns     | ns     | ns     | ns     | ns     |        |        |        |        |        |        |      |      |       |
| USA300   | **       | ns     | **   | ns     | ns     | ns     | ns     | ns     | ns     |        |        |        |        |        |      |      |       |
| USA500   | ***      | ns     | ***  | ns     | ns     | ***    | **     | ns     | ns     | ns     |        |        |        |        |      |      |       |
| USA700   | ns       | ns     | ns   | ***    | ns     | ns     | ns     | ns     | ns     | ns     | **     |        |        |        |      |      |       |
| USA800   | ns       | ns     | ns   | *      | ns     | ns     | ns     | ns     | ns     | ns     | ns     | ns     |        |        |      |      |       |
| USA600   |          |        |      |        |        |        |        | **     |        |        |        |        |        |        |      |      |       |
|          | ns       | ns     | ns   | ***    | ns     | ns     | ns     | *      | *      | **     | ***    | ns     | ns     |        |      |      |       |
| Mu50     | ns       | ns     | ns   | ***    | ns     | ns     | ns     | ns     | ns     | ns     | **     | ns     | ns     | ns     |      |      |       |
| VRS2     | ***      | ns     | ***  | ns     | ns     | *      | ns     | ns     | ns     | ns     | ns     | ns     | ns     | ns     | ***  |      |       |
| VRS3A    | *        | ns     | *    | ns     | ns     | ns     | ns     | ns     | ns     | ns     | ns     | ns     | ns     | ns     | *    | ns   |       |
