# Supplementary material for: Strains of bacterial species induce a greatly varied acute adaptive immune response: The contribution of the accessory genome
Source: PubMed Central journal article supplement (PMC5764401; doi:10.1371/journal.ppat.1006726), 2018-01-11
Supplement: ppat.1006726.s005.pdf [file ppat.1006726.s005.pdf]

**Table 5:**  
**Post-hoc analysis from MANOVA for T cell and B cell proliferation**

| contrast        | estimate | SE       | df | t. ratio | p.value |
|-----------------|----------|----------|----|----------|---------|
| Mu50 - Newman   | -6.125   | 1.025474 | 36 | -5.973   | <.0001  |
| Mu50 - USA100   | -2.625   | 1.025474 | 36 | 0.634    | 0.5302  |
| Mu50 - USA600   | 5.675    | 1.025474 | 36 | 5.534    | <.0001  |
| Newman - USA100 | 6.775    | 1.025474 | 36 | 6.607    | <.0001  |
| Newman - USA600 | 11.800   | 1.025474 | 36 | 11.507   | <.0001  |
| USA100 - USA600 | 8.075    | 1.025474 | 36 | 4.900    | <.0001  |
