# Supplementary material for: Strains of bacterial species induce a greatly varied acute adaptive immune response: The contribution of the accessory genome
Source: PubMed Central journal article supplement (PMC5764401; doi:10.1371/journal.ppat.1006726), 2018-01-11
Supplement: ppat.1006726.s006.pdf [file ppat.1006726.s006.pdf]

**Table 6:**  
**Post-hoc analysis from MANOVA for IFNg and IgG expression**

| contrast        | estimate | SE        | df | t. ratio | p.value |
|-----------------|----------|-----------|----|----------|---------|
| Mu50 - Newman   | -3.275   | 0.9896338 | 36 | -3.309   | 0.0032  |
| Mu50 - USA100   | -2.625   | 0.9896338 | 36 | -2.652   | 0.0142  |
| Mu50 - USA600   | 5.450    | 0.9896338 | 36 | 5.507    | <.0001  |
| Newman - USA100 | 0.650    | 0.9896338 | 36 | 0.657    | 0.5155  |
| Newman - USA600 | 8.725    | 0.9896338 | 36 | 8.816    | <.0001  |
| USA100 - USA600 | 8.075    | 0.9896338 | 36 | 8.160    | <.0001  |
