# Supplementary material for: Strains of bacterial species induce a greatly varied acute adaptive immune response: The contribution of the accessory genome
Source: PubMed Central journal article supplement (PMC5764401; doi:10.1371/journal.ppat.1006726), 2018-01-11
Supplement: ppat.1006726.s007.pdf [file ppat.1006726.s007.pdf]

**S7 Table****Table 7:  
Post-hoc analysis from MANOVA for IFNg and IgG expression**

| contrast        | estimate | SE        | df | t. ratio | p.value |
|-----------------|----------|-----------|----|----------|---------|
| Mu50 - USA500   | -6.375   | 0.9799731 | 36 | -6.505   | <.0001  |
| Mu50 - USA100   | -2.625   | 0.9799731 | 36 | -2.679   | 0.0111  |
| Mu50 - USA600   | 5.450    | 0.9799731 | 36 | 5.561    | <.0001  |
| USA500 - USA100 | 3.750    | 0.9799731 | 36 | 3.827    | 0.0006  |
| USA500 - USA600 | 11.825   | 0.9799731 | 36 | 12.067   | <.0001  |
| USA100 - USA600 | 8.075    | 0.9799731 | 36 | 8.240    | <.0001  |
