# Supplementary material for: Strains of bacterial species induce a greatly varied acute adaptive immune response: The contribution of the accessory genome
Source: PubMed Central journal article supplement (PMC5764401; doi:10.1371/journal.ppat.1006726), 2018-01-11

%IFN $\gamma$  expressing and proliferating CD3+CD4+ cells in response to 16 strains in 10 donors.

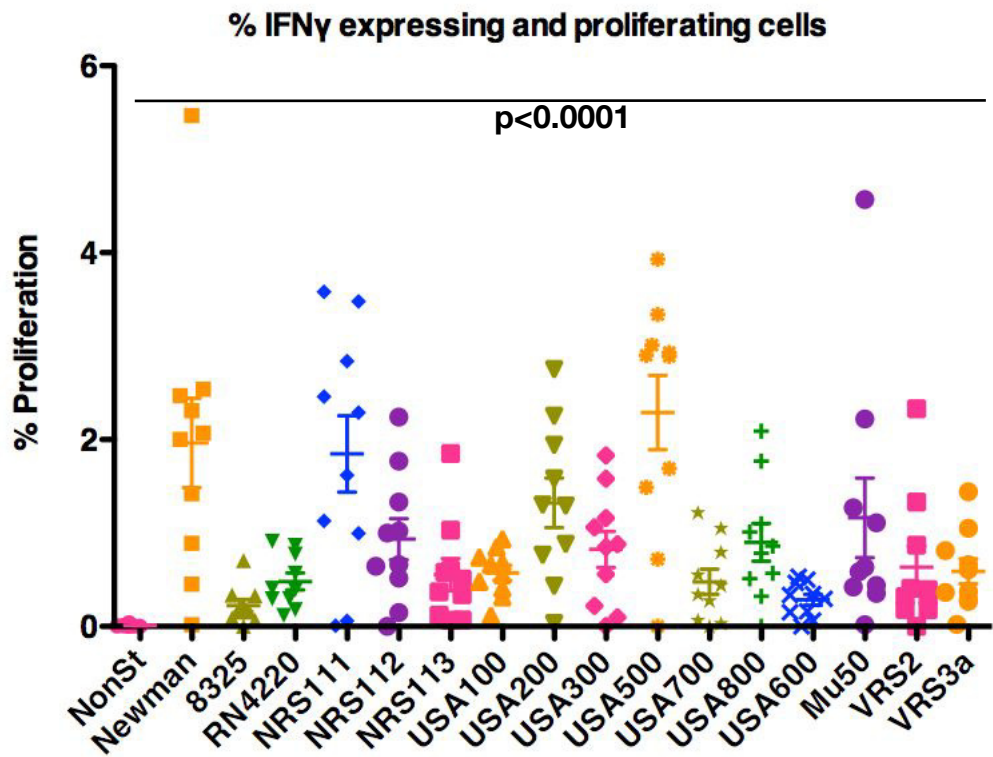

Supplement: ppat.1006726.s009.pdf [file ppat.1006726.s009.pdf]
