# Supplementary material for: Strains of bacterial species induce a greatly varied acute adaptive immune response: The contribution of the accessory genome
Source: PLoS Pathog. 2018 Jan 11;14(1):e1006726. doi: 10.1371/journal.ppat.1006726 (PMC5764401; doi:10.1371/journal.ppat.1006726)
Supplement: S3 Table — (PDF) [file ppat.1006726.s003.pdf]

### S3 Table

**Table 3: post-hoc pairwise comparisons of %B cell proliferating cells by 16 *S. aureus* strains**

[illegible]
